# Supplementary material for: Protein signatures linking history of miscarriages and metabolic syndrome: a proteomic study among North Indian women
Source: PeerJ. 2019 Feb 14;7:e6321. doi: 10.7717/peerj.6321 (PMC6378092; doi:10.7717/peerj.6321)
Supplement: Supplemental Information 5 [file peerj-07-6321-s005.xls]

## Sheet: Sheet1
group A																					Absolute cases	Absolute controls	Only metabolic	Only miscarriage
OD	0.7694	0.7352	0.7897	0.7688	0.8037	0.8797	0.7972	0.784	0.9582	0.8646	0.8179	0.9643	0.7121	0.7178	0.9266	0.8275	0.9115	1.044	0.7924	0.8406	0.8992	0.33985	0.4393	0.1427		Absolute cases	Absolute controls	Only metabolic	Only miscarriage
	1.029	0.7997	0.8883	0.9412	0.806	0.8364	0.8151	0.8846	0.8687	0.9719	0.8644	1.112	0.733	0.7583	0.703	0.7648	0.7801	0.6869	0.63	0.7804	0.76745	0.24955	0.3071	0.13515		0.833975	0.333188	0.37309	0.203365
Avg	0.8992	0.76745	0.839	0.855	0.80485	0.85805	0.80615	0.8343	0.91345	0.91825	0.84115	1.03815	0.72255	0.73805	0.8148	0.79615	0.8458	0.86545	0.7112	0.8105	0.839	0.26455	0.37755	0.1995
																					0.855	0.2873	0.3942	0.2315
group B																					0.80485	0.26645	0.34425	0.2498
OD	0.3204	0.2294	0.3105	0.3211	0.2644	0.2747	0.1952	0.2812	0.4217	0.4883	0.508	0.3898	0.2684	0.338	0.3172	0.329	0.2995	0.303	0.2633	0.3913	0.85805	0.2518	0.39895	0.15945
	0.3593	0.2697	0.2186	0.2535	0.2685	0.2289	0.1668	0.317	0.4641	0.4302	0.4389	0.5529	0.2515	0.3516	0.4396	0.3241	0.4604	0.3077	0.247	0.4628	0.80615	0.181	0.3459	0.14915
Avg	0.33985	0.24955	0.26455	0.2873	0.26645	0.2518	0.181	0.2991	0.4429	0.45925	0.47345	0.47135	0.25995	0.3448	0.3784	0.32655	0.37995	0.30535	0.25515	0.42705	0.8343	0.2991	0.3743	0.1911
																					0.91345	0.4429	0.45195	0.25485
group C																					0.91825	0.45925	0.4581	0.26485
OD	0.3112	0.2764	0.33	0.3103	0.3429	0.4198	0.3379	0.3248	0.4967	0.4053	0.3596	0.5027	0.251	0.2564	0.4657	0.3656	0.4495	0.5811	0.3305	0.3789	0.84115	0.47345	0.3816	0.19575
	0.5674	0.3378	0.4251	0.4781	0.3456	0.3781	0.3539	0.4238	0.4072	0.5109	0.4036	0.6506	0.2713	0.2966	0.242	0.3036	0.3177	0.2259	0.1693	0.3188	1.03815	0.47135	0.57665	0.16815
Avg	0.4393	0.3071	0.37755	0.3942	0.34425	0.39895	0.3459	0.3743	0.45195	0.4581	0.3816	0.57665	0.26115	0.2765	0.35385	0.3346	0.3836	0.4035	0.2499	0.34885	0.72255	0.25995	0.26115	0.18615
																					0.73805	0.3448	0.2765	0.2471
group D																					0.8148	0.3784	0.35385	0.2441
OD	0.1284	0.1483	0.2287	0.2283	0.261	0.1486	0.1702	0.1978	0.2514	0.2467	0.2047	0.1866	0.1859	0.2405	0.2399	0.1582	0.1544	0.2013	0.2612	0.2698	0.79615	0.32655	0.3346	0.15585
	0.157	0.122	0.1703	0.2347	0.2386	0.1703	0.1281	0.1844	0.2583	0.283	0.1868	0.1497	0.1864	0.2537	0.2483	0.1535	0.1342	0.2102	0.2708	0.2824	0.8458	0.37995	0.3836	0.1443
Avg	0.1427	0.13515	0.1995	0.2315	0.2498	0.15945	0.14915	0.1911	0.25485	0.26485	0.19575	0.16815	0.18615	0.2471	0.2441	0.15585	0.1443	0.20575	0.266	0.2761	0.86545	0.30535	0.4035	0.20575
																					0.7112	0.25515	0.2499	0.266
																					0.8105	0.42705	0.34885	0.2761
																				avg	0.833975	0.333188	0.37309	0.203365
																				SD	0.0749307	0.0862666	0.0750124	0.0475049

## Sheet: Sheet2
					Absolute cases	Absolute controls	Only metabolic	Only miscarriage
					0.8992	0.33985	0.4393	0.1427
					0.76745	0.24955	0.3071	0.13515								2.23532
					0.839	0.26455	0.37755	0.1995			Group A	Group B	Group C	Group D		4.10088
					0.855	0.2873	0.3942	0.2315			0.833975	0.333188	0.37309	0.203365
					0.80485	0.26645	0.34425	0.2498			2.50302		2.23532	4.10088		2.50302
					0.85805	0.2518	0.39895	0.15945
					0.80615	0.181	0.3459	0.14915
					0.8343	0.2991	0.3743	0.1911
					0.91345	0.4429	0.45195	0.25485
					0.91825	0.45925	0.4581	0.26485
					0.84115	0.47345	0.3816	0.19575
					1.03815	0.47135	0.57665	0.16815
					0.72255	0.25995	0.26115	0.18615
					0.73805	0.3448	0.2765	0.2471
					0.8148	0.3784	0.35385	0.2441
					0.79615	0.32655	0.3346	0.15585
					0.8458	0.37995	0.3836	0.1443
					0.86545	0.30535	0.4035	0.20575
					0.7112	0.25515	0.2499	0.266
					0.8105	0.42705	0.34885	0.2761
				avg	0.833975	0.333188	0.37309	0.203365
				SD	0.0749307	0.0862666	0.0750124	0.0475049

## Sheet: Sheet3
	Absolute cases	Absolute controls	Only metabolic	Only miscarriage			1	0.8992
	0.8992	0.33985	0.4393	0.1427			1	0.76745
	0.76745	0.24955	0.3071	0.13515			1	0.839
	0.839	0.26455	0.37755	0.1995			1	0.855
	0.855	0.2873	0.3942	0.2315			1	0.80485
	0.80485	0.26645	0.34425	0.2498			1	0.85805
	0.85805	0.2518	0.39895	0.15945			1	0.80615
	0.80615	0.181	0.3459	0.14915			1	0.8343
	0.8343	0.2991	0.3743	0.1911			1	0.91345
	0.91345	0.4429	0.45195	0.25485			1	0.91825
	0.91825	0.45925	0.4581	0.26485			1	0.84115
	0.84115	0.47345	0.3816	0.19575			1	1.03815
	1.03815	0.47135	0.57665	0.16815			1	0.72255
	0.72255	0.25995	0.26115	0.18615			1	0.73805
	0.73805	0.3448	0.2765	0.2471			1	0.8148
	0.8148	0.3784	0.35385	0.2441			1	0.79615
	0.79615	0.32655	0.3346	0.15585			1	0.8458
	0.8458	0.37995	0.3836	0.1443			1	0.86545
	0.86545	0.30535	0.4035	0.20575			1	0.7112
	0.7112	0.25515	0.2499	0.266			1	0.8105
	0.8105	0.42705	0.34885	0.2761			2	0.33985
							2	0.24955
							2	0.26455
							2	0.2873
							2	0.26645
							2	0.2518
							2	0.181
							2	0.2991
							2	0.4429
							2	0.45925
							2	0.47345
							2	0.47135
							2	0.25995
							2	0.3448
							2	0.3784
							2	0.32655
							2	0.37995
							2	0.30535
							2	0.25515
							2	0.42705
