# Supplementary material for: Protein signatures linking history of miscarriages and metabolic syndrome: a proteomic study among North Indian women
Source: PeerJ. 2019 Feb 14;7:e6321. doi: 10.7717/peerj.6321 (PMC6378092; doi:10.7717/peerj.6321)
Supplement: Supplemental Information 6 [file peerj-07-6321-s006.xls]

## Sheet: Blank Subtraction 1_01
Measurement results
Blank Subtraction 1
Wavelength: 492 nm
Plate 1
Blank subtracted	1	2	3	4	5	6	7	8	9	10	11	12
A	0.7694	0.7352	0.7897	0.7688	0.8037	0.8797	0.7972	0.784	0.9582	0.8646	0.8179	0.9643
B	1.029	0.7997	0.8883	0.9412	0.806	0.8364	0.8151	0.8846	0.8687	0.9719	0.8644	1.112
C	0.7121	0.7178	0.9266	0.8275	0.9115	1.044	0.7924	0.8406
D	0.733	0.7583	0.703	0.7648	0.7801	0.6869	0.63	0.7804
E
F
G
H											-0.00305	0.00305
Sample	1	2	3	4	5	6	7	8	9	10	11	12
A	Un0001	Un0005	Un0009	Un0013	Un0017	Un0021	Un0025	Un0029	Un0033	Un0035	Un0037	Un0039
B	Un0002	Un0006	Un0010	Un0014	Un0018	Un0022	Un0026	Un0030	Un0034	Un0036	Un0038	Un0040
C	Un0003	Un0007	Un0011	Un0015	Un0019	Un0023	Un0027	Un0031
D	Un0004	Un0008	Un0012	Un0016	Un0020	Un0024	Un0028	Un0032
E
F
G
H											Blank1	Blank1
