# Supplementary material for: Protein signatures linking history of miscarriages and metabolic syndrome: a proteomic study among North Indian women
Source: PeerJ. 2019 Feb 14;7:e6321. doi: 10.7717/peerj.6321 (PMC6378092; doi:10.7717/peerj.6321)
Supplement: Supplemental Information 7 [file peerj-07-6321-s007.xls]

## Sheet: Blank Subtraction 1_01
Measurement results
Blank Subtraction 1
Wavelength: 492 nm
Plate 1
Blank subtracted	1	2	3	4	5	6	7	8	9	10	11	12
A
B
C
D
E	0.3204	0.2294	0.3105	0.3211	0.2644	0.2747	0.1952	0.2812	0.4217	0.4883	0.508	0.3898
F	0.3593	0.2697	0.2186	0.2535	0.2685	0.2289	0.1668	0.317	0.4641	0.4302	0.4389	0.5529
G	0.2684	0.338	0.3172	0.329	0.2995	0.303	0.2633	0.3913
H	0.2515	0.3516	0.4396	0.3241	0.4604	0.3077	0.247	0.4628			0.0015	-0.0015
Sample	1	2	3	4	5	6	7	8	9	10	11	12
A
B
C
D
E	Un0001	Un0005	Un0009	Un0013	Un0017	Un0021	Un0025	Un0029	Un0033	Un0035	Un0037	Un0039
F	Un0002	Un0006	Un0010	Un0014	Un0018	Un0022	Un0026	Un0030	Un0034	Un0036	Un0038	Un0040
G	Un0003	Un0007	Un0011	Un0015	Un0019	Un0023	Un0027	Un0031
H	Un0004	Un0008	Un0012	Un0016	Un0020	Un0024	Un0028	Un0032			Blank1	Blank1
