# Supplementary material for: Protein signatures linking history of miscarriages and metabolic syndrome: a proteomic study among North Indian women
Source: PeerJ. 2019 Feb 14;7:e6321. doi: 10.7717/peerj.6321 (PMC6378092; doi:10.7717/peerj.6321)
Supplement: Supplemental Information 8 [file peerj-07-6321-s008.xls]

## Sheet: Blank Subtraction 1_01
Measurement results
Blank Subtraction 1
Wavelength: 492 nm
Plate 1
Blank subtracted	1	2	3	4	5	6	7	8	9	10	11	12
A	0.3112	0.2764	0.33	0.3103	0.3429	0.4198	0.3379	0.3248	0.4967	0.4053	0.3596	0.5027
B	0.5674	0.3378	0.4251	0.4781	0.3456	0.3781	0.3539	0.4238	0.4072	0.5109	0.4036	0.6506
C	0.251	0.2564	0.4657	0.3656	0.4495	0.5811	0.3305	0.3789
D	0.2713	0.2966	0.242	0.3036	0.3177	0.2259	0.1693	0.3188
E
F
G
H											0.00155	-0.00155
Sample	1	2	3	4	5	6	7	8	9	10	11	12
A	Un0001	Un0005	Un0009	Un0013	Un0017	Un0021	Un0025	Un0029	Un0033	Un0035	Un0037	Un0039
B	Un0002	Un0006	Un0010	Un0014	Un0018	Un0022	Un0026	Un0030	Un0034	Un0036	Un0038	Un0040
C	Un0003	Un0007	Un0011	Un0015	Un0019	Un0023	Un0027	Un0031
D	Un0004	Un0008	Un0012	Un0016	Un0020	Un0024	Un0028	Un0032
E
F
G
H											Blank1	Blank1
